# Supplementary material for: Enhanced field emission performance of gold nanoparticle decorated Bi2S3 nanoflowers
Source: Royal Society of Chemistry journal article supplement (doi:10.1039/d4na00539b), 2024-11-13
Supplement: d4na00539b1.pdf [file d4na00539b1.pdf]

## Supporting Information

Figure S1:

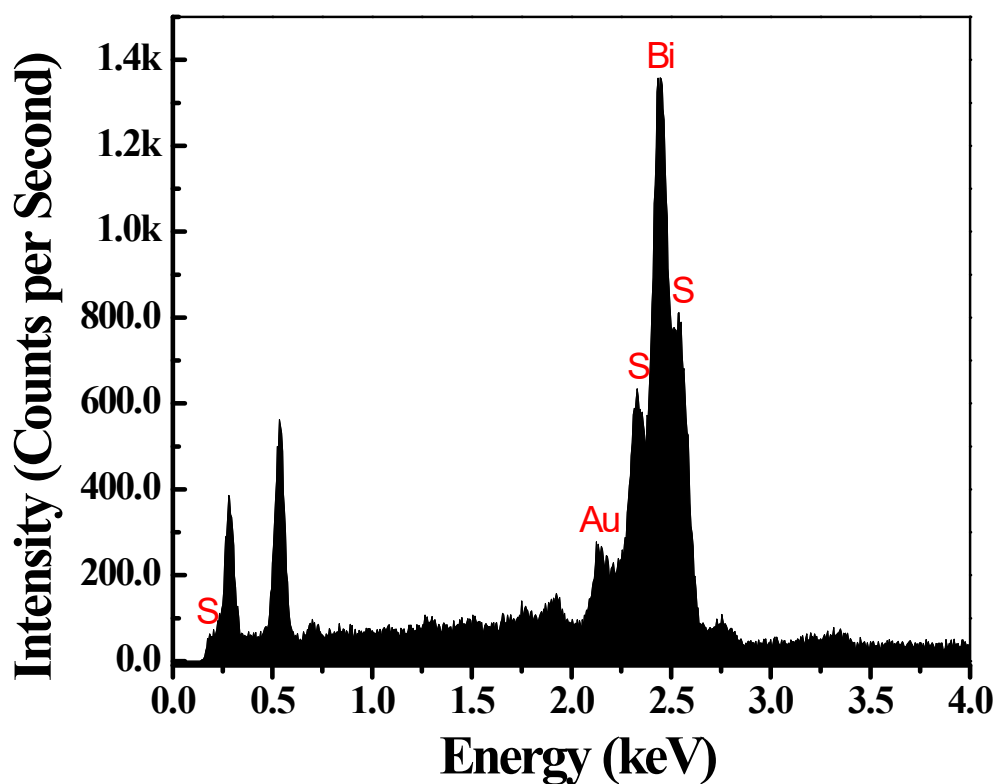

| Sr. no. | Element | Weight% |
|---------|---------|---------|
| 1.      | Au      | 8.20    |
| 2.      | S       | 10.73   |
| 3.      | Bi      | 81.07   |

Figure S1: EDAX analysis of Au nanoparticle decorated Bi<sub>2</sub>S<sub>3</sub> nanoflower.

Figure S2:

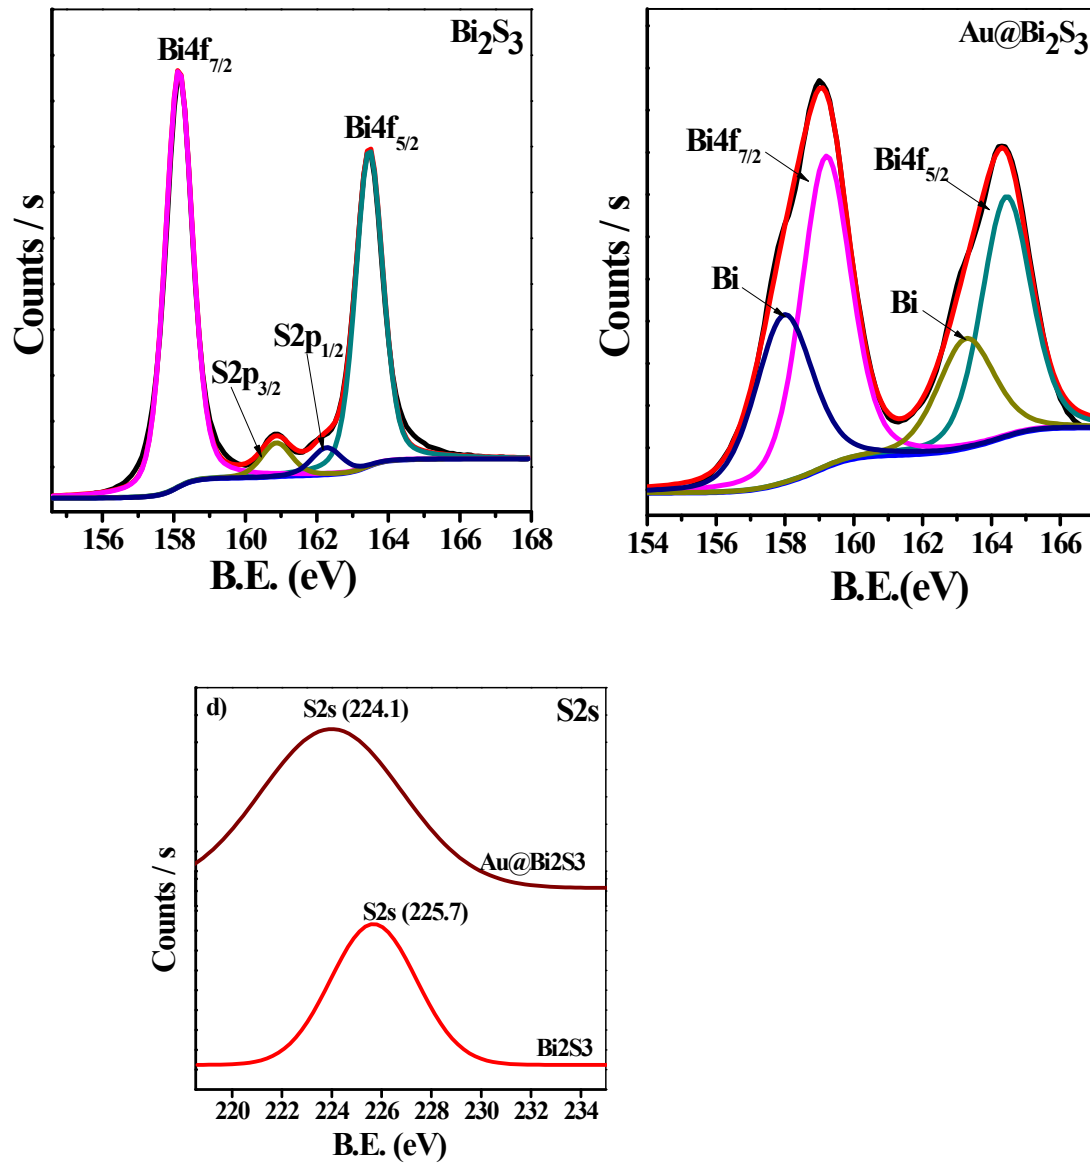

Figure S2: XPS deconvolution spectra for Bi<sub>2</sub>S<sub>3</sub> nanoflower and Au decorated Bi<sub>2</sub>S<sub>3</sub> nanoflower.

**Figure S3:**

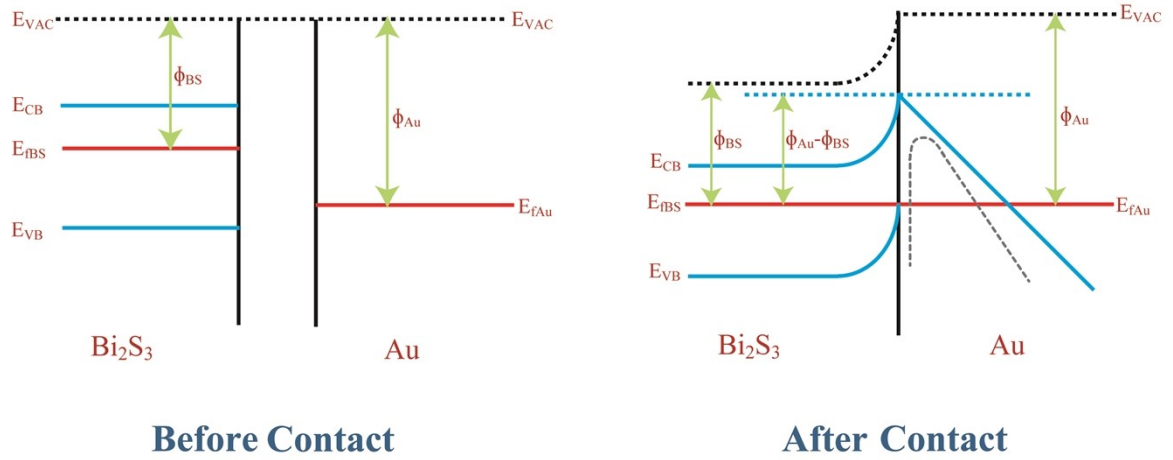

Figure S3: Field emission Energy band Diagram showing emission current tunneling from VB to CB at an intense electric field.
